# Supplementary material
Source: PubMed Central journal article supplement (PMC4710429)
Supplement: SD4.pdf [file SD4.pdf]

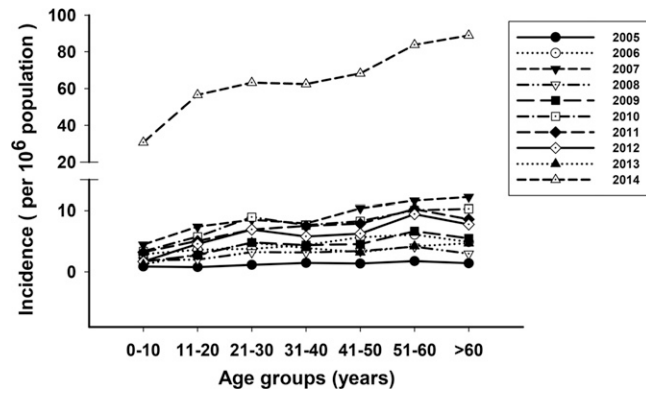

SUPPLEMENTAL FIGURE 1. Age distribution of dengue fever cases during 2005–2014 in Taiwan. The dengue virus laboratory-confirmed cases were grouped into different age intervals. This data are referenced from Taiwan Centers for Disease Control and Prevention.

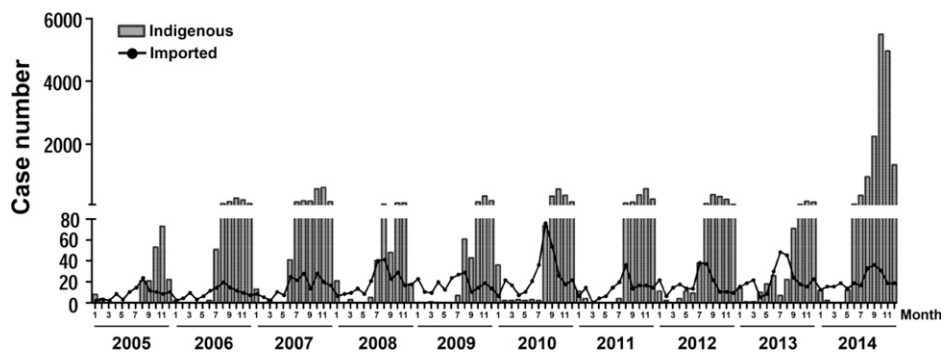

SUPPLEMENTAL FIGURE 2. Dengue imported and indigenous cases during 2005–2014 in Taiwan. The dengue virus imported and indigenous cases were recorded per month during 2005–2014 in Taiwan. The data were collected from Taiwan Centers for Disease Control and Prevention. All these dengue imported and indigenous cases were confirmed by laboratory diagnosis.
